# Supplementary material
Source: publisher site journal article supplement (https://www.dovepress.com/article/472963)
Supplement: Supplementary file 1 [file get_supplementary_file.php]

| Mature ID | Forward primer | Reverse primer |
| --- | --- | --- |
| miR-4657 | GCGAATGTGGAAGTGGTCTG | AGTGCAGGGTCCGAGGTATT |
| miR-6750-5p | GCAGGGAACAGCTGGGTGA | AGTGCAGGGTCCGAGGTATT |
| miR-3174 | GCGCGTAGTGAGTTAGAGATGC | AGTGCAGGGTCCGAGGTATT |
| miR-7975 | CGCGCGATCCTAGTCACG | AGTGCAGGGTCCGAGGTATT |
| miR-520d-3p | CGCGAAAGTGCTTCTCTTTG | AGTGCAGGGTCCGAGGTATT |
| miR-192-3p | GCGCTGCCAATTCCATAGG | AGTGCAGGGTCCGAGGTATT |

Table S1. Primers of miRNAs
